# Supplementary material for: CFTR function, pathology and pharmacology at single-molecule resolution
Source: PubMed Central journal article supplement (PMC10115640; doi:10.1038/s41586-023-05854-7), 2023-03-22
Supplement: 41586_2023_5854_MOESM1_ESM.pdf [file 41586_2023_5854_MOESM1_ESM.pdf]

---

**Supplementary information**

---

**CFTR function, pathology and  
pharmacology at single-molecule resolution**

---

In the format provided by the  
authors and unedited

1

## **CFTR function, pathology and pharmacology at single-molecule resolution**

2

Jesper Levring<sup>1</sup>, Daniel S. Terry<sup>2</sup>, Zeliha Kilic<sup>2</sup>, Gabriel Fitzgerald<sup>3</sup>, Scott Blanchard<sup>2,\*</sup> & Jue Chen<sup>1,4,\*</sup>

3

<sup>1</sup>Laboratory of Membrane Biology and Biophysics, The Rockefeller University, 1230 York Ave, New York, NY, USA.

4

<sup>2</sup>Department of Structural Biology, St. Jude Children's Research Hospital, Memphis, TN, USA.

5

<sup>3</sup>Department of Physiology and Biophysics, Weill Cornell Medicine, 1300 York Ave, New York, NY, USA.

6

<sup>4</sup>Howard Hughes Medical Institute, The Rockefeller University, 1230 York Ave, New York, NY, USA.

7

\*To whom correspondence should be addressed: Scott.Blanchard@stjude.org, juechen@rockefeller.edu.

## 8 Supplementary Methods

### 9 Calculations of the steady state population fractions

10 Here, we demonstrate the kinetic scheme formulation at physiologically relevant saturating ATP  
11 concentrations ( $> 1$  mM) denoted with  $[ATP]$  starting with the state occupation probabilities when the  
12 system is at steady state. The population fractions of the states are labeled with  $S_l$  for  $l = 1, 2, \dots, 8$ .  
13 Temporal evolution of these population fractions is governed by the following set of equations where the  
14 transition rates from state  $l$  to  $l'$  are shown with  $k_{l \rightarrow l'}$ , for all  $l \neq l' = 1, 2, \dots, 8$

$$15 \quad \frac{dS_1}{dt} = - (k_{1 \rightarrow 2} [ATP] + k_{1 \rightarrow 8}) S_1 + k_{2 \rightarrow 1} S_2 + k_{8 \rightarrow 1} S_8,$$

$$16 \quad \frac{dS_2}{dt} = - (k_{2 \rightarrow 1} + k_{2 \rightarrow 3}) S_2 + k_{3 \rightarrow 2} S_3 + k_{1 \rightarrow 2} [ATP] S_1,$$

$$17 \quad \frac{dS_3}{dt} = - (k_{3 \rightarrow 8} + k_{3 \rightarrow 2} + k_{3 \rightarrow 4}) S_3 + k_{2 \rightarrow 3} S_2 + k_{4 \rightarrow 3} S_4 + k_{8 \rightarrow 3} [ATP] S_8,$$

$$18 \quad \frac{dS_4}{dt} = - (k_{4 \rightarrow 3} + k_{4 \rightarrow 5}) S_4 + k_{3 \rightarrow 4} S_3 + k_{5 \rightarrow 4} S_5,$$

$$19 \quad \frac{dS_5}{dt} = - (k_{5 \rightarrow 4} + k_{5 \rightarrow 6}) S_5 + k_{4 \rightarrow 5} S_4 + k_{6 \rightarrow 5} S_6,$$

$$20 \quad \frac{dS_6}{dt} = - (k_{6 \rightarrow 5} + k_{6 \rightarrow 7}) S_6 + k_{7 \rightarrow 6} S_7 + k_{5 \rightarrow 6} S_5,$$

$$21 \quad \frac{dS_7}{dt} = - (k_{7 \rightarrow 6} + k_{7 \rightarrow 8}) S_7 + k_{6 \rightarrow 7} S_6 + k_{8 \rightarrow 7} S_8,$$

$$22 \quad \frac{dS_8}{dt} = - (k_{8 \rightarrow 3} [ATP] + k_{8 \rightarrow 7} + k_{8 \rightarrow 1}) S_8 + k_{1 \rightarrow 8} S_1 + k_{8 \rightarrow 1} S_8,$$

$$23 \quad \sum_{k=1}^8 S_k = 1.$$

24 Here, the last equation imposes conservation of mass on the population fractions. We find the steady state  
 25 solution for the state population fractions. steady state population fractions is used to initialize our data  
 26 simulation. Below we provide the details of the data simulation.

27 **Simulation of simultaneous electrophysiology and smFRET data**

28 In our simulation setup, we imagine visualizing the single molecule conformations with smFRET and  
 29 electrophysiology, simultaneously. As the single molecule transitions amongst its conformational states  
 30 labeled with  $S_l$  for  $l = 1, 2, \dots, 8$  where some of these states give rise the same signal in smFRET or  
 31 electrophysiology measurements as summarized below in **Supplementary Table 1** with kinetic rates  
 32 provided in **Supplementary Table 2**.

33 **Supplementary Table 1.** Conformational states and their associated signals in smFRET and electrophysiology  
 34 measurements.

| occupied conformational state | smFRET signal | electrophysiology signal |
|-------------------------------|---------------|--------------------------|
| $S_1$                         | low FRET      | no current               |
| $S_2$                         | low FRET      | no current               |
| $S_3$                         | high FRET     | no current               |
| $S_4$                         | high FRET     | no current               |
| $S_5$                         | high FRET     | current                  |
| $S_6$                         | high FRET     | current                  |
| $S_7$                         | high FRET     | no current               |
| $S_8$                         | high FRET     | no current               |

35  
 36 Here, we simulate the trajectory reporting on the conformational dynamics of the single molecule in  
 37 continuous time as a Gillespie<sup>60</sup> trajectory where these conformational dynamics are governed by the  
 38 following generator matrix labeled with  $\bar{G}$

|       | $S_1$                 | $S_2$                      | $S_3$                      | $S_4$                 | $S_5$                 | $S_6$                 | $S_7$                 | $S_8$                 |
|-------|-----------------------|----------------------------|----------------------------|-----------------------|-----------------------|-----------------------|-----------------------|-----------------------|
| $S_1$ | *                     | $k_{1 \rightarrow 2}[ATP]$ | 0                          | 0                     | 0                     | 0                     | 0                     | $k_{1 \rightarrow 8}$ |
| $S_2$ | $k_{2 \rightarrow 1}$ | *                          | $k_{2 \rightarrow 3}$      | 0                     | 0                     | 0                     | 0                     | 0                     |
| $S_3$ | 0                     | $k_{3 \rightarrow 2}$      | *                          | $k_{3 \rightarrow 4}$ | 0                     | 0                     | 0                     | $k_{3 \rightarrow 8}$ |
| $S_4$ | 0                     | 0                          | $k_{4 \rightarrow 3}$      | *                     | $k_{4 \rightarrow 5}$ | 0                     | 0                     | 0                     |
| $S_5$ | 0                     | 0                          | 0                          | $k_{5 \rightarrow 4}$ | *                     | $k_{5 \rightarrow 6}$ | 0                     | 0                     |
| $S_6$ | 0                     | 0                          | 0                          | 0                     | $k_{6 \rightarrow 5}$ | *                     | $k_{6 \rightarrow 7}$ | 0                     |
| $S_7$ | 0                     | 0                          | 0                          | 0                     | 0                     | $k_{7 \rightarrow 6}$ | *                     | $k_{7 \rightarrow 8}$ |
| $S_8$ | $k_{8 \rightarrow 1}$ | 0                          | $k_{8 \rightarrow 3}[ATP]$ | 0                     | 0                     | 0                     | $k_{8 \rightarrow 7}$ | *                     |

39 where the \* notation shows the negative of the sum of each row.

41 Subsequently, this trajectory of the single molecule gives rise to smFRET and electrophysiology  
42 measurements. For example, if the molecule has dimerized NBDs and an open pore then this conformation  
43 of the molecule leads to high FRET and high current measurements in smFRET and electrophysiology,  
44 respectively.

45 In a prototypical smFRET experiment, FRET efficiency (FRET) is computed based on the photons emitted  
46 from donor ( $n_D$ ) and acceptor dyes ( $n_A$ ) that are attached to the single molecule where  $FRET = \frac{n_A}{n_A + n_D}$ .

47 In our simulations, we adjusted the photon emission rates of donor and acceptor dyes according to known  
48 total experimentally observed photon counts such that the low and high FRET signals are equivalent to  
49  $\sim 20\%$  and  $\sim 55\%$  FRET, respectively. For the electrophysiology measurements, based on the occupied  
50 states of the single molecule's trajectory, we generate measurements. Specifically, low (closed channel  
51 conformation) and high (open channel conformation) current levels are adjusted according to the  
52 experimentally observed conformational state levels in electrophysiology experiments where low and high  
53 current levels are  $\sim 0$  pA and  $\sim 2$  pA. Both smFRET and electrophysiology measurements are acquired with  
54 a camera-based detector<sup>61</sup> thereby the measurements are subject to temporal averaging provided that the  
55 conformational dynamics of the molecule are faster than the data acquisition rate labeled with  $\frac{1}{\Delta t}$  where  $\Delta t$   
56 denotes the data acquisition period. We use  $\Delta t^F$  and  $\Delta t^E$  for smFRET and electrophysiology experiments,  
57 respectively. Here, we denote the trajectory of the molecule with  $\tau(t)$ , for all  $t \geq 0$ , where photon emission

58 rates for donor and acceptor dyes that lead to low and high FRET levels are denoted with  $\bar{\mu}_D = (\mu_1^D, \mu_2^D)$  and  
 59  $\bar{\mu}_A = (\mu_1^A, \mu_2^A)$ . We also note that for a given time  $t$ ,  $\tau(t) = S_l$  for some  $l = 1, 2, \dots, 8$ . Low and high  
 60 current state levels for the electrophysiology measurements are denoted with  $\bar{C} = (C_1, C_2)$ . We assumed  
 61 shot noise for the smFRET measurements and normally distributed measurement noise for the  
 62 electrophysiology experiments.

63 Now, we summarize how simulated measurements in smFRET and electrophysiology experiments are  
 64 generated.

65 Based on Gillespie simulation, we generate  $\tau(\cdot) \sim \text{Gillespie}(\bar{G}, \tau(0))$ , where ' $\sim$ ' stands for sampling of  $\tau(\cdot)$   
 66 as a Gillespie trajectory with a given starting point denoted with  $\tau(0)$  at time  $t = 0$  that is determined based  
 67 on the steady state probability of state occupation explained above. Subsequently, given the photon  
 68 emission rates  $\bar{\mu}_D$  and  $\bar{\mu}_A$  of donor and acceptor dyes we can now formulate the collected photons associated  
 69 with donor and acceptor dyes. The measurements are labeled with  $\bar{w}_D = (w_1^D, w_2^D, \dots, w_N^D)$  and  $\bar{w}_A =$   
 70  $(w_1^A, w_2^A, \dots, w_N^A)$  on the donor and acceptor dyes associated detectors in smFRET experimental setup  
 71 where  $w_n^D, w_n^A$  denote the  $n$ -th measurement for all  $n = 1, 2, \dots, N$  with  $N$  labeling the last smFRET  
 72 measurement. Then, we now formulate the  $n$ -th measurement during the data acquisition period  $\Delta t^F$  within  
 73 the time window of  $[t_{n-1}, t_{n-1} + \Delta t^F]$  such that  $w_n^D \sim \text{Poisson}(\int_{t_{n-1}}^{t_{n-1} + \Delta t^F} dt \mu_{\tau(t)}^D)$  and  
 74  $w_n^A \sim \text{Poisson}(\int_{t_{n-1}}^{t_{n-1} + \Delta t^F} dt \mu_{\tau(t)}^A)$  for all  $n = 1, \dots, N$ . Here, "Poisson" denotes the distribution to  
 75 formulate the shot noise statistics in the measurements. Next, we move to the electrophysiology  
 76 measurements labeled with  $\bar{y} = (y_1, y_2, \dots, y_M)$  where  $M$  labels the last measurement in  
 77 electrophysiology experiments. In the case of acquiring electrophysiological data, we assume that the  
 78 measurement noise is governed by "Normal" distribution and thereby the  $m$ -th measurement labeled with  
 79  $y_m$  collected with data acquisition rate  $\frac{1}{\Delta t^E}$  within the time window  $[t_{m-1}, t_{m-1} + \Delta t^E]$  shown as

80  $y_m \sim \text{Normal}(\frac{1}{\Delta t^E} \int_{t_{m-1}}^{t_{m-1} + \Delta t^E} dt C_{\tau}(t), \sigma^2)$  for all  $m = 1, 2, \dots, M$  where  $\sigma^2$  ( $pA^2$ ) denotes the measurement  
81 noise.

82 In our current study, the only noise sources are the shot noise due to photon emissions for smFRET and  
83 normally distributed measurement noise for electrophysiology. We have not considered the read-out or any  
84 jittering noises dictated by the type of detector used in the experiments. Those additional improvements  
85 related to the measurement models in our simulations that are left for future studies.

86 **Supplementary Table 2.** Kinetic rate parameters used in simulations. \*For simulation of E1371Q gating

87  $k_{5 \rightarrow 6}$  was set to zero.

88

| rates                 | units                           | values |
|-----------------------|---------------------------------|--------|
| $k_{1 \rightarrow 2}$ | $\mu\text{M}^{-1}\text{s}^{-1}$ | 1      |
| $k_{2 \rightarrow 1}$ | $\text{s}^{-1}$                 | 50     |
| $k_{2 \rightarrow 3}$ | $\text{s}^{-1}$                 | 10     |
| $k_{3 \rightarrow 2}$ | $\text{s}^{-1}$                 | 0.3    |
| $k_{1 \rightarrow 8}$ | $\text{s}^{-1}$                 | 0.3    |
| $k_{8 \rightarrow 1}$ | $\text{s}^{-1}$                 | 0.3    |
| $k_{3 \rightarrow 8}$ | $\text{s}^{-1}$                 | 0.6    |
| $k_{8 \rightarrow 3}$ | $\mu\text{M}^{-1}\text{s}^{-1}$ | 0.012  |
| $k_{3 \rightarrow 4}$ | $\text{s}^{-1}$                 | 1.3    |
| $k_{4 \rightarrow 3}$ | $\text{s}^{-1}$                 | 0.002  |
| $k_{5 \rightarrow 4}$ | $\text{s}^{-1}$                 | 20     |
| $k_{4 \rightarrow 5}$ | $\text{s}^{-1}$                 | 100    |
| $k_{5 \rightarrow 6}$ | $\text{s}^{-1}$                 | 2*     |
| $k_{6 \rightarrow 5}$ | $\text{s}^{-1}$                 | 0      |
| $k_{6 \rightarrow 7}$ | $\text{s}^{-1}$                 | 4      |
| $k_{7 \rightarrow 6}$ | $\text{s}^{-1}$                 | 0      |
| $k_{7 \rightarrow 8}$ | $\text{s}^{-1}$                 | 4.5    |
| $k_{8 \rightarrow 7}$ | $\text{s}^{-1}$                 | 0      |

89

90 **REFERENCES:**

91

92 60. Gillespie, D. T. (1977). Exact stochastic simulation of coupled chemical reactions. *The journal of physical*  
93 *chemistry*, 81(25), 2340-2361.

94

95 61. Pati, A. K., El Bakouri, O., Jockusch, S., Zhou, Z., Altman, R. B., Fitzgerald, G. A., ... & Blanchard, S. C.  
96 (2020). Tuning the Baird aromatic triplet-state energy of cyclooctatetraene to maximize the self-healing  
97 mechanism in organic fluorophores. *Proceedings of the National Academy of Sciences*, 117(39), 24305-  
98 24315.

99



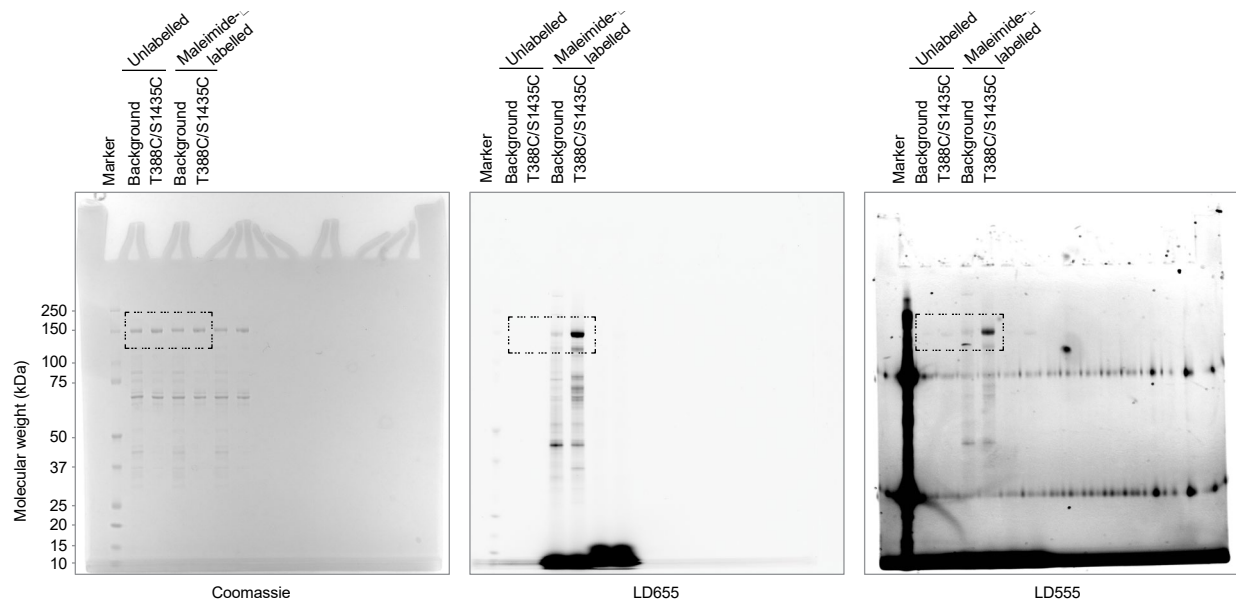

**Supplementary Figure 1 | Gel source data**

Uncropped gel scans of the gel imaged in Extended Data Figure 2a. The gel was first imaged for LD555 and LD655 fluorescence, and then Coomassie-stained. The dashed boxes indicate the regions of the scans that are presented in Extended Data Figure 2a.
